# Supplementary material for: Unlocking superior Li+ transport and anodic compatibility for solid polymer electrolytes by zwitterionic metal–organic filler-mediated Li+ coordination engineering
Source: Royal Society of Chemistry journal article supplement (doi:10.1039/d6sc03303b), 2026-05-27
Supplement: d6sc03303b1.pdf [file d6sc03303b1.pdf]

## Supporting Information

### Unlocking Superior Li<sup>+</sup> Transport and Anodic Compatibility for Solid Polymer Electrolytes by Zwitterionic Metal–Organic Filler–Mediated Li<sup>+</sup> Coordination Engineering

Mochun Zhang,<sup>‡a</sup> Zhengguang Li,<sup>‡b</sup> Yuyan Liu,<sup>c</sup> Bo Hong,<sup>a,d,e,f,g</sup> Fuhua Yang,<sup>a,d,e,f,g</sup> Mengran Wang,<sup>\* a,d,e,f,g</sup> Die Liu,<sup>\*b</sup> Pingshan Wang,<sup>b</sup> Yanqing Lai<sup>\*a,d,e,f,g,h</sup>

<sup>a</sup> School of Metallurgy and Environment, Central South University, Changsha 410083, P. R. China

<sup>b</sup> Department of Organic and Polymer Chemistry, Hunan Key Laboratory of Micro & Nano Materials Interface Science, College of Chemistry and Chemical Engineering, Central South University, Changsha 410083 P. R. China

<sup>c</sup> College of Chemistry, Nankai University, Tianjin 300071, P. R. China

<sup>d</sup> Engineering Research Centre of Advanced Battery Materials, The Ministry of Education, Changsha 410083, P. R. China

<sup>e</sup> National Energy Metal Resources and New Materials Key Laboratory, Changsha 410083, P. R. China

<sup>f</sup> National Engineering Research Center of Advanced Energy Storage Materials, Changsha 410083, P. R. China

<sup>g</sup> Hunan Provincial Key Laboratory of Nonferrous Value-Added Metallurgy, Changsha 410083, P. R. China

<sup>h</sup> Yuelushan Center for Industrial Innovation, Changsha 410083, P. R. China

\* Corresponding author

Email addresses: mengranwang93@163.com (Mengran Wang), chem-ld@csu.edu.cn (Die Liu), laianqing@csu.edu.cn (Yanqing Lai)

24

## 1 Experimental section

### 2 Materials

3 Poly(vinylidene fluoride-co-hexafluoropropylene) (PVDF-HFP, average Mw: ~400,000), N, N-  
4 Dimethylformamide (DMF, >99.9%), Lithium hydroxide (LiOH, 99.9%), 5-aminosalicylic acid  
5 ( $\geq 98\%$ ), boric acid (99.99%), Acetonitrile (ACN) were all purchased from Shanghai Macklin  
6 Biochemical Technology Co., Ltd. 1,3,5-tris(bromomethyl)-2,4,6-trimethylbenzene ( $\geq 98\%$ ), 4-bromo-  
7 2-hydroxybenzaldehyde ( $\geq 98\%$ ), 4-formylphenylboronic acid ( $\geq 98\%$ ) and 2-acetyl-4-methylpyridine  
8 were purchased from Bidepharm (Shanghai, China). lithium bis(trifluoromethanesulfonyl)imide  
9 (LiTFSI, 99.9%) was procured from Duoduochem without further purification. Carbon black and  
10 PVDF (99.5%) were obtained from Taiyuan Liyuan Lithium Technology Center.  $\text{LiNi}_{0.8}\text{Co}_{0.1}\text{Mn}_{0.1}\text{O}_2$   
11 (NCM811) powder was sourced from the Minmetals New Energy Materials (Hunan) Co., Ltd. All the  
12 materials were stored in an Ar-filled glove box ( $\text{H}_2\text{O} < 0.1$  ppm,  $\text{O}_2 < 0.1$  ppm).

### 13 Preparation of Cage

14 To a mixed solvent of  $\text{CHCl}_3$  (100 mL) and MeOH (100 mL) ligand **L** (306 mg, 0.2 mmol) was  
15 added, then a solution of  $\text{Zn}(\text{NO}_3)_2 \cdot 6\text{H}_2\text{O}$  (89.4 mg, 0.3 mmol) in  $\text{CH}_3\text{OH}$  (10.0 mL) was added. After  
16 stirring the mixture at 65 °C for 12 h, excess  $\text{Li}(\text{NTf}_2)_2$  was added to precipitate the complex, which  
17 was then filtered, washed with  $\text{H}_2\text{O}$ , and then dried *in vacuo*. The desired **Cage** was obtained (92%)  
18 as the pale-yellow solid.

### 19 Preparation of LiB5AB

20 lithium bis (5-Aminosalicylic acid) borate (LiB5AB) was synthesized according to the procedure  
21 described in Figure S2. 0.39 g of Lithium hydroxide (16.5 mmol), 5.00 g of 5-aminosalicylic acid (33  
22 mmol), and 1.01 g of boric acid (16.5 mmol) were added to acetonitrile and heated at 80 °C. A light  
23 brown solid powder was collected by filtration. The  $^1\text{H}$ ,  $^{11}\text{B}$  NMR, and mass spectra of LiB5AB are  
24 shown in Figure S2.

### 25 Preparation of LS filler

26 The cage was dissolved in anhydrous DMF to prepare a dark brown solution with a concentration  
27 of 19 mg  $\text{mL}^{-1}$ . 6 mL of this solution was accurately measured and placed in a glass reaction bottle.  
28 Then, 11.1 mg of the LiB5AB was added. The reaction bottle was transferred to a glove box and stirred

1 at 60 °C for 24 h. During the reaction, it could be observed that LiB5AB was completely dissolved,  
2 and the solution color gradually changed from dark brown to yellow, followed by the precipitation of  
3 yellow precipitate. After the reaction was completed, the reaction bottle was removed from the glove  
4 box, and no washing was required. It was directly subjected to ultrasonic treatment for 30 min, then  
5 returned to the glove box for continued stirring overnight. Finally, a uniformly dispersed product LS  
6 dispersion liquid was obtained.

## 7 **Preparation of LSPH and PH-Li electrolytes**

8 In the synthesized LS dispersion solution, 400 mg of PVDF-HFP and 270 mg of LiTFSI were  
9 directly added and stirred continuously at room temperature for 12 h to obtain a uniform casting  
10 solution. Then, the casting solution was poured into an 18 mm diameter polytetrafluoroethylene  
11 (PTFE) mold and the mold was placed on a heating plate. It was dried at 60 °C for 12 h and then at 80  
12 °C for 4 h to finally obtain the LSPH electrolyte membrane. In this formulation, the mass of LS  
13 corresponds to approximately 30 wt.% relative to PVDF-HFP.

14 The preparation process of the PH-Li electrolyte is similar to that of LSPH, but no LS filler is  
15 introduced. The specific steps are: measure 6 mL of DMF solvent, add 400 mg of PVDF-HFP and 270  
16 mg of LiTFSI, and stir at room temperature for 12 h to form a uniform solution. The solution was  
17 poured into the same PTFE mold and dried at 60°C for 12 h. The key difference from the LSPH process  
18 is that this process does not undergo a secondary drying at 80°C to retain a certain amount of residual  
19 DMF solvent, thereby obtaining the PH-Li electrolyte membrane.

## 20 **Materials characterization**

21 In situ Fourier transform infrared spectroscopy (FTIR) was employed to analyze the functional  
22 group changes of the electrolytes before and after polymerization, enabling the assessment of  
23 polymerization success. FTIR measurements were conducted using a Nicolet iS50 instrument (Thermo  
24 Fisher Technology), with an infrared spectral range of 400–4000  $\text{cm}^{-1}$ . Both the monomer and the  
25 prepared solid electrolyte were tested in a room temperature air atmosphere.

26 Thermogravimetric analysis (TGA) was used to investigate the thermal stability of the solid  
27 electrolytes. The thermal analysis was performed using an STA 449 F5 Jupiter instrument (Nez  
28 Instrument Manufacturing, Germany) with a test temperature range of 30–600 °C, a heating rate of 10

1 °C min<sup>-1</sup>, and a nitrogen atmosphere.

2 X-ray diffraction (XRD) was employed to determine the crystallinity of the solid electrolyte. XRD  
3 measurements were carried out with a Rui Ying 2Empyrean 2 instrument (PANalytical, Netherlands)  
4 using a copper target, with an angle range of 10° to 80° and a sweep speed of 10° min<sup>-1</sup>.

5 Scanning electron microscopy (SEM) was used to examine the microstructure of the polymer solid  
6 electrolyte and electrode plates. An energy dispersive X-ray spectrometer (EDS) was also employed  
7 to investigate the elemental distribution on the surface of materials through point scanning, line  
8 scanning, and surface scanning. The SEM instrument used was a TESCAN CLARA model.

9 Transmission electron microscopy (TEM) was used to observe the ultrastructure of the materials,  
10 particularly the active material properties of the recycled lithium cobalt oxide electrode. The TEM  
11 measurements were conducted with a JEM-F200 instrument (JEOL, Japan).

12 X-ray photoelectron spectroscopy (XPS) was used to analyze the chemical states and molecular  
13 structures of elements on the material's surface, particularly to examine the composition of the interface  
14 layer on the positive and negative electrodes after cycling. The XPS analysis was performed using an  
15 ESCALAB 250Xi instrument (Thermo Fisher Scientific).

16 <sup>1</sup>H NMR, <sup>13</sup>C NMR, <sup>11</sup>B NMR, <sup>19</sup>F NMR, NOESY, COSY and DOSY spectra were recorded on  
17 Bruker Avance 400-MHz or 500-MHz NMR spectrometers using CDCl<sub>3</sub>, *d*<sub>6</sub>-DMSO and CD<sub>3</sub>CN as  
18 the solvents with tetramethylsilane (TMS) as the internal standard at room temperature. ESI mass  
19 spectrometry were conducted on a Waters Synapt HDMS G2-Si instrument with a LockSpray ESI  
20 source, using the following parameters: ESI capillary voltage, 1.3-3.0 kV; sample cone voltage, 20-25  
21 V; extraction cone voltage, 1.1-3 V; desolvation gas flow, 800 L/h (N<sub>2</sub>); trap collision energy (CE), 4  
22 V; transfer CE, 0 V; trap gas flow, 2.0 mL/min (Ar); source temperature, 30 °C; and desolvation  
23 temperature, 30 °C. All samples were dissolved in CH<sub>3</sub>CN/CHCl<sub>3</sub> or CH<sub>3</sub>CN/DMF (1:1, v/v). Data  
24 were collected and analyzed by using MassLynx 4.2 (Waters).

## 25 **Electrochemical characterization**

26 The steel symmetric battery was assembled in a glove box, and electrochemical impedance  
27 spectroscopy (EIS) was conducted using a Gamry instrument to measure the impedance of the battery.  
28 Afterward, the steel symmetric battery was disassembled, and the thickness of the in-situ polymerized  
29 solid electrolyte film was measured. The ionic conductivity ( $\sigma$ ) of the electrolyte was then calculated

1 using the following formula:

$$\sigma = \frac{L}{RS}$$

2  
3 Where the  $\sigma$  represents the ion conductivity of electrolyte, L is the thickness of electrolyte, R is  
4 the impedance, and S is the effective area of the electrolyte.

5 The activation energy is the energy barrier that lithium ions must overcome during internal  
6 migration within the battery. The ion conductivity ( $\sigma$ ) of different temperatures was fitted into the  
7 Arrhenius model to calculate the activation energy ( $E_a$ ) of PVT, PVT-C and PVT-CB electrolytes. The  
8 formula is as follows:

$$\sigma(T) = A \exp\left(-\frac{E_a}{RT}\right)$$

9  
10 Where  $E_a$  is the activation energy, A is the pre-exponential factor, and R is the ideal gas constant  
11 ( $8.314 \text{ J mol}^{-1} \text{ K}^{-1}$ )

12 The calculation of lithium-ion transference number ( $t_{Li^+}$ ) was determined by assembling lithium  
13 symmetric batteries Li|SPEs|Li. Chronoamperometry was performed by applying a constant voltage  
14 of 10 mV, and the impedance in the frequency range of 0.1 Hz to 1 MHz was recorded before and after  
15 the test. The lithium-ion transference number was calculated using the following formula:

$$t_{Li^+} = \frac{I_{SS}(\Delta V - I_0 R_0)}{I_0(\Delta V - I_{SS} R_{SS})}$$

16  
17 Where  $\Delta V$  is the polarization voltage,  $I_0$  and  $I_{SS}$  represent the initial and steady-state currents, and  
18  $R_0$  and  $R_{SS}$  are the interfacial impedances before and after polarization, respectively.

19 To evaluate the interfacial stability of the electrolytes with the electrodes, batteries based on  
20 SS|SPE|Li were tested using linear sweep voltammetry (LSV). The voltage sweep was applied from 3  
21 V to 6 V at a sweep rate of  $1 \text{ mV s}^{-1}$ .

22 The galvanostatic charge-discharge performance of the batteries based on Li|SPEs|Li was tested  
23 using a LAND battery test system with a current density of  $0.1 \text{ mA cm}^{-2}$ . Additionally, to evaluate the  
24 stripping and deposition behavior of the lithium metal anode, tests were conducted at different current  
25 densities. For the Li|SPEs|NCM811 batteries, the cycling stability was assessed with charge and  
26 discharge voltages set between 2.5 and 4.5 V, using the same LAND battery test system.

## 1 **Theoretical Calculations**

2 The calculations about binding energy were carried out using a DFT framework as implemented with  
3 the projector augmented wave (PAW) method by the Vienna Ab-initio Simulation Package (VASP).<sup>1</sup>  
4 <sup>2</sup> The electronic exchange-correlation interaction was described by the Perdew-Burke-Ernzerhof  
5 (PBE) functional under the generalized gradient approximation (GGA).<sup>3</sup> The kinetic cutoff energy for  
6 the plane-wave basis was set to 450 eV and the convergence thresholds of total energy and force during  
7 geometry optimizations were  $10^{-5}$  eV and  $0.03 \text{ eV } \text{\AA}^{-1}$ , respectively. Meanwhile, the DFT-D3 method  
8 was adopted to take the long-range van der Waals interaction into account.<sup>4</sup> The Brillouin zone was  
9 sampled using the Gamma-centered Monkhorst-Pack method with a k-point mesh of  $0.04 \text{ } 2\pi \text{ } \text{\AA}^{-1}$  for  
10 geometry optimizations of all configurations.<sup>5</sup> The ab-initio molecular dynamics (AIMD) simulations  
11 were conducted at normal pressure and temperature in the canonical ensemble via Nosé-Hoover  
12 thermostat for 12ps with the time step 1fs.<sup>6,7</sup> The plane-wave cutoff energy was reset to 400 eV and  
13 the convergence criterion for the electronic steps was reset to  $1 \times 10^{-4}$  eV. Except for LS-cage, the  
14 model systems were composed of LiTFSI, DMF, and short-chain PVDF-HFP, with a molar ratio of  
15 1.00:3.44:3.46 and a bulk density of  $0.938 \text{ g cm}^{-3}$ .

16

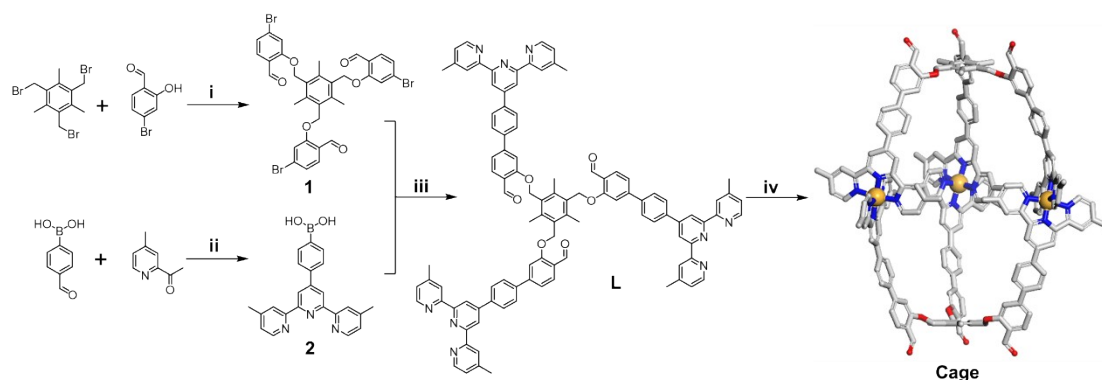

1

2 **Figure S1** The route for synthesizing ligand **L** and **Cage**. Reagents and conditions: (i)  $\text{K}_2\text{CO}_3$ , DMF,  
 3  $90^\circ\text{C}$ , 24h; (ii)  $\text{NaOH}$ , EtOH,  $\text{NH}_3\cdot\text{H}_2\text{O}$ ; (iii) toluene/ $\text{H}_2\text{O}$ /*t*-BuOH (3:3:1, v/v/v),  $\text{K}_2\text{CO}_3$ ,  $\text{Pd}(\text{PPh}_3)_4$ ,  
 4 refluxed; (iv)  $\text{Zn}(\text{NO}_3)_2\cdot 6\text{H}_2\text{O}$ ,  $\text{CHCl}_3/\text{MeOH}$ , refluxed.

5 **Compound 1**. 1,3,5-tris(bromomethyl)-2,4,6-trimethylbenzene (3.98 g, 10.0 mmol), 4-bromo-2-  
 6 hydroxybenzaldehyde (7.24 g, 36.0 mmol) and  $\text{K}_2\text{CO}_3$  (12.4 g, 90.0 mmol) were added into a 250 mL  
 7 round-bottomed flask with 100 ml DMF as solvent. After stirring at  $90^\circ\text{C}$  for 24 hours, the reaction  
 8 mixture was cooled to  $25^\circ\text{C}$ . The mixture was extracted with  $\text{CHCl}_3$  and the combined organic extract  
 9 was evaporated to dryness *in vacuo* to give a residue, then subjected to column chromatography ( $\text{SiO}_2$ ,  
 10  $\text{CH}_2\text{Cl}_2/\text{MeOH} = 100:2$ ) for giving **Compound 1** (6.45 g, 85%);  $^1\text{H}$  NMR (400 MHz,  $\text{CDCl}_3$ )  $\delta$  10.31  
 11 (s, 3H), 7.73 (d,  $J = 8.2$  Hz, 3H), 7.39 (s, 3H), 7.25 (d,  $J = 8.8$  Hz, 3H), 5.24 (s, 6H), 2.48 (s, 9H);  $^{13}\text{C}$   
 12 NMR (100 MHz,  $\text{CDCl}_3$ )  $\delta$  188.63, 161.41, 140.11, 130.96, 130.74, 129.83, 124.90, 124.09, 116.40,  
 13 66.07, 16.38; ESI/MS ( $m/z$ ): Calcd. For  $[\text{C}_{33}\text{H}_{27}\text{Br}_3\text{O}_6+\text{H}]^+$ : 759.29, Found: 759.54.

14 **Compound 2** was synthesized according to a literature procedure.<sup>8</sup>

15 **Compound L**. To a flask containing **Compound 1** (1.52 g, 2 mmol), **Compound 2** (2.74 g, 7.2 mmol)  
 16 and  $\text{K}_2\text{CO}_3$  (2.48 g, 18 mmol), a mixed solvent (140 mL) of toluene/ $\text{H}_2\text{O}$ /*t*-BuOH (3:3:1, v/v/v) was  
 17 added. After  $\text{Pd}(\text{PPh}_3)_4$  (346 mg, 0.3 mmol) was added, the system was pumped and backfilled with  
 18 nitrogen. Then the mixture was refluxed for 2 days under  $\text{N}_2$ . After cooled to  $25^\circ\text{C}$ , the mixture was  
 19 extracted with  $\text{CHCl}_3$  and the combined organic extract was evaporated to dryness *in vacuo* to give a  
 20 residue that was washed with MeOH, then subjected to column chromatography ( $\text{Al}_2\text{O}_3$ ,  $\text{CH}_2\text{Cl}_2/\text{MeOH}$   
 21 = 100:2) and then recrystallized from a mixture of  $\text{CHCl}_3/\text{MeOH}$  to give **Compound L**, as a light  
 22 yellow solid (2.14 g, 70%);  $^1\text{H}$  NMR (400 MHz,  $\text{CDCl}_3$ )  $\delta$  10.45 (s, 3H), 8.76 (s, 6H), 8.59 (d,  $J = 5.0$   
 23 Hz, 6H), 8.48 (s, 6H), 8.03 (d,  $J = 8.0$  Hz, 6H), 7.97 (d,  $J = 8.0$  Hz, 3H), 7.80 (d,  $J = 8.0$  Hz, 6H), 7.49  
 24 (s, 3H), 7.37 (d,  $J = 8.0$  Hz, 3H), 7.19 (d,  $J = 5.1$  Hz, 6H), 5.41 (s, 6H), 2.59 (s, 9H), 2.52 (s, 18H);  $^{13}\text{C}$   
 25 NMR (100 MHz,  $\text{CDCl}_3$ )  $\delta$  189.36, 161.78, 156.38, 156.03, 149.36, 149.10, 148.41, 148.27, 140.56,  
 26 139.98, 138.82, 131.36, 129.11, 128.06, 127.97, 125.07, 124.25, 122.30, 120.32, 118.99, 111.40,  
 27 65.95, 21.51, 16.48; ESI/MS ( $m/z$ ): Calcd. For  $[\text{C}_{102}\text{H}_{81}\text{N}_9\text{O}_6+\text{H}]^+$ : 1528.83, Found: 1528.63.

28 **Cage**. To a mixed solvent of  $\text{CHCl}_3$  (100 mL) and MeOH (100 mL) ligand **L** (306 mg, 0.2 mmol) was  
 29 added, then a solution of  $\text{Zn}(\text{NO}_3)_2\cdot 6\text{H}_2\text{O}$  (89.4 mg, 0.3 mmol) in  $\text{CH}_3\text{OH}$  (10.0 mL) was added. After  
 30 stirring the mixture at  $65^\circ\text{C}$  for 12 h, excess  $\text{Li}(\text{NTf}_2)_2$  was added to precipitate the complex, which  
 31 was then filtered, washed with  $\text{H}_2\text{O}$ , and then dried *in vacuo*. The desired **Cage** was obtained (92%)

1 as the pale-yellow solid.  $^1\text{H}$  NMR (400 MHz, Acetonitrile- $d_3$ )  $\delta$  10.51 (s, 6H), 9.03 (s, 12H), 8.63 (s,  
2 12H), 8.38 (d,  $J = 8.2$  Hz, 12H), 8.22 (d,  $J = 8.0$  Hz, 12H), 8.03 (d,  $J = 8.0$  Hz, 6H), 7.83 (s, 6H), 7.69  
3 (d,  $J = 5.3$  Hz, 12H), 7.63 (d,  $J = 8.1$  Hz, 6H), 7.24 (d,  $J = 5.2$  Hz, 12H), 5.55 (s, 12H), 2.65 (s, 18H),  
4 2.50 (s, 36H).

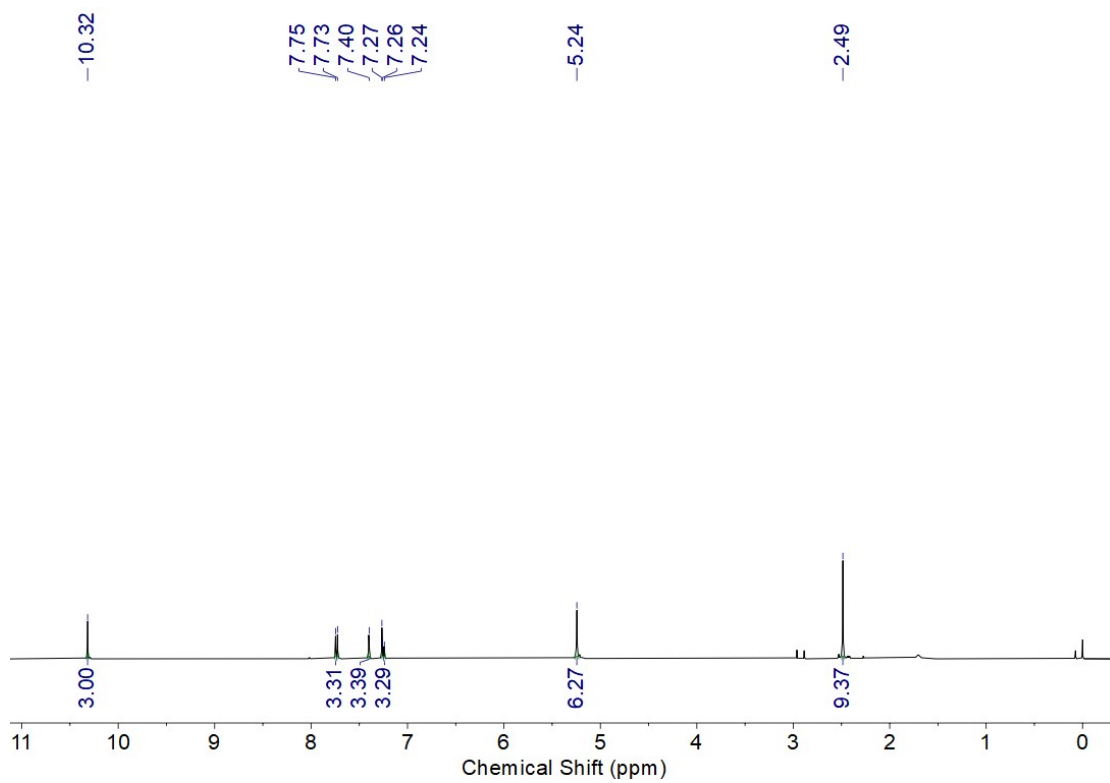

1

2 **Figure S2.**  $^1\text{H}$  NMR spectrum of **Compound 1** in  $\text{CDCl}_3$ .

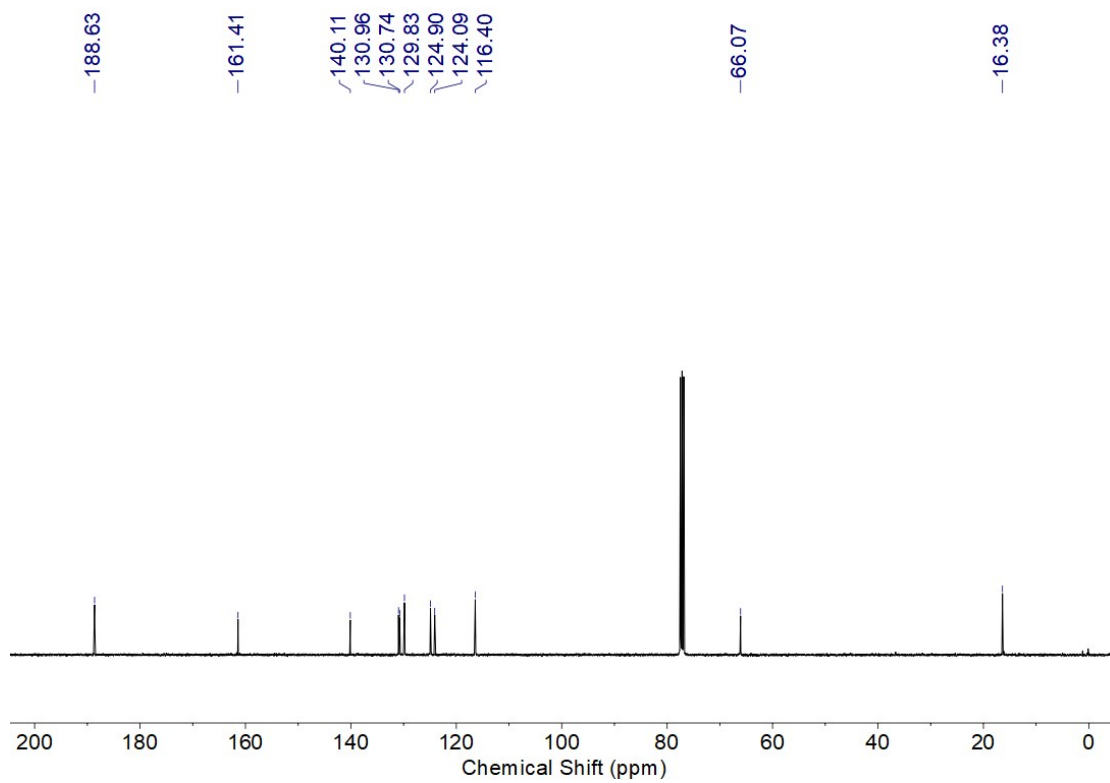

1

2 **Figure S3.**  $^{13}\text{C}$  NMR spectrum of **Compound 1** in  $\text{CDCl}_3$ .

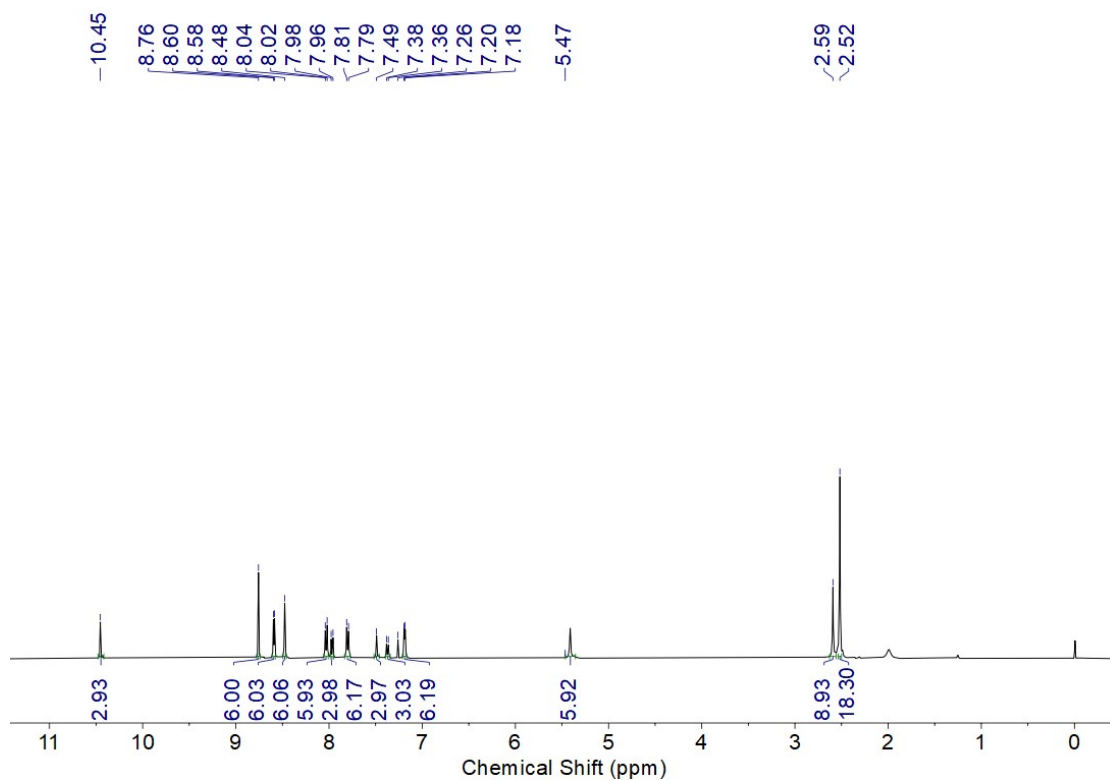

1

2 **Figure S4.** <sup>1</sup>H NMR spectrum of **Compound L** in CDCl<sub>3</sub>.

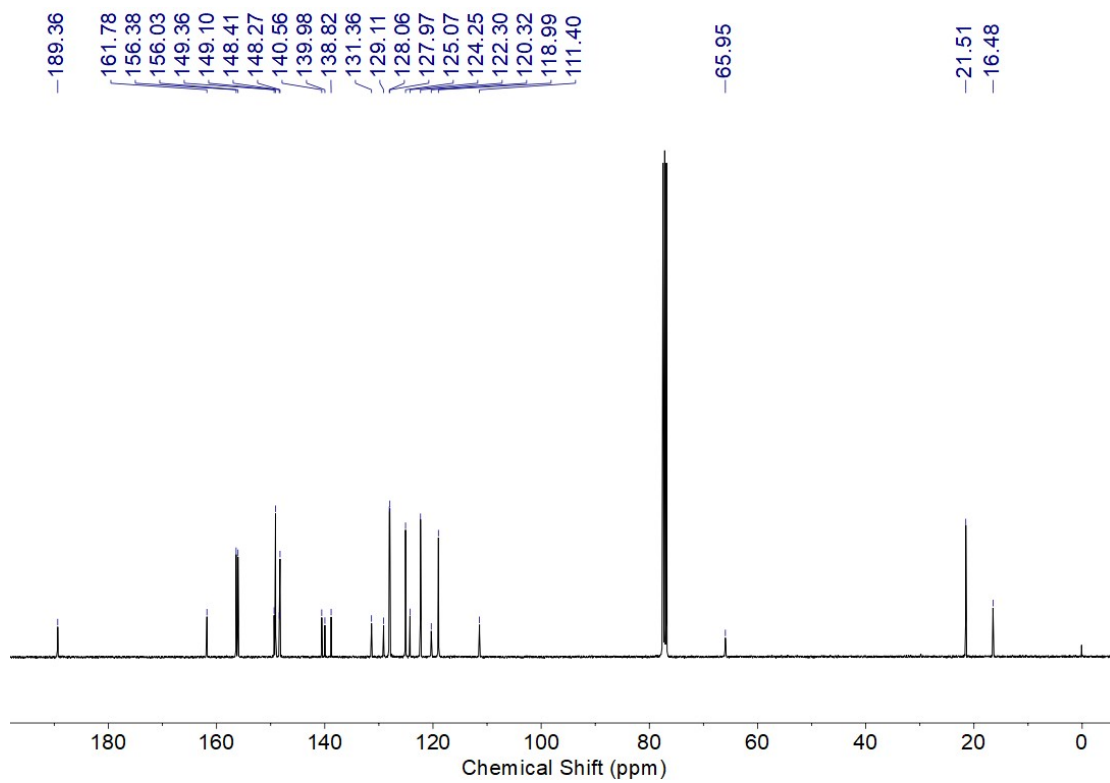

1

2 **Figure S5.**  $^{13}\text{C}$  NMR spectrum of **Compound L** in  $\text{CDCl}_3$ .

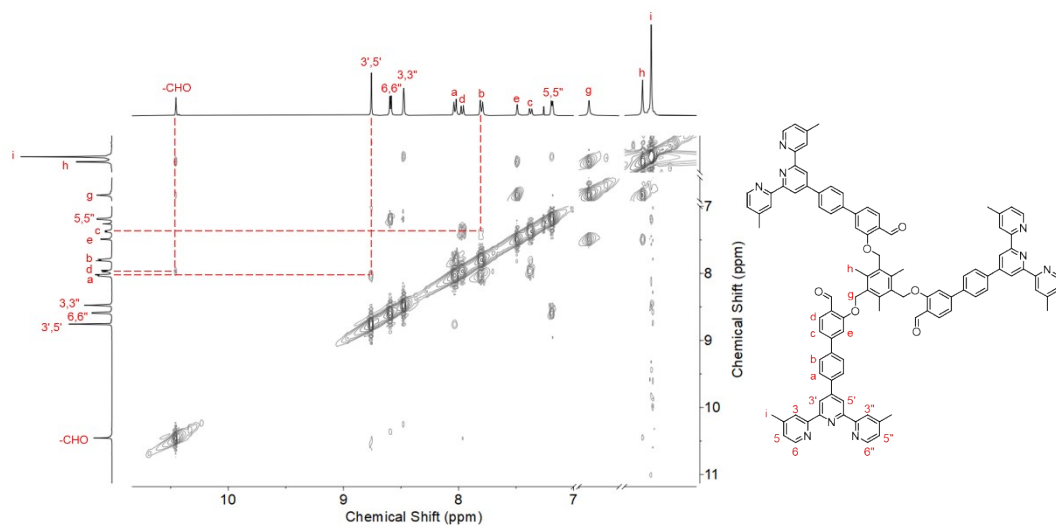

1

2 **Figure S6.** NOESY spectrum of **Compound L** in CDCl<sub>3</sub>.

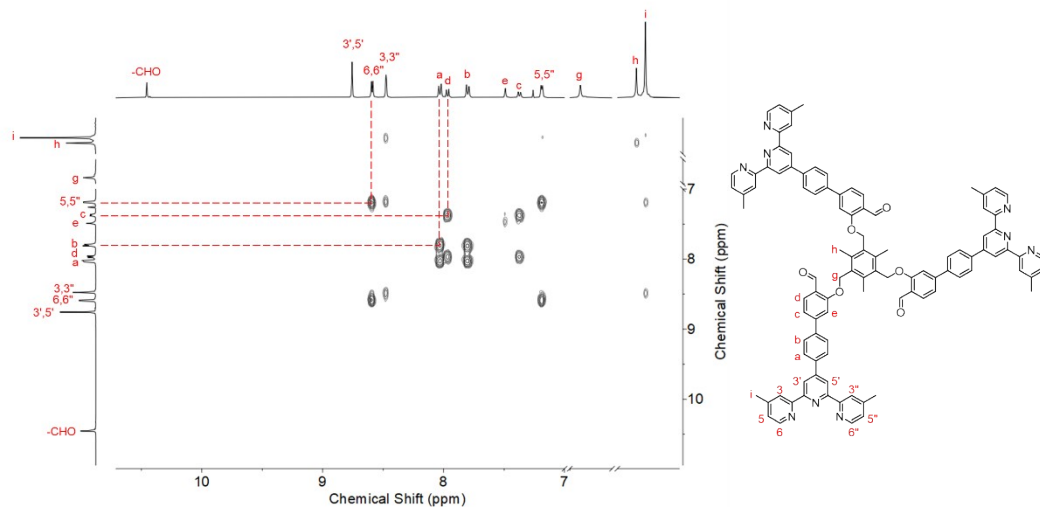

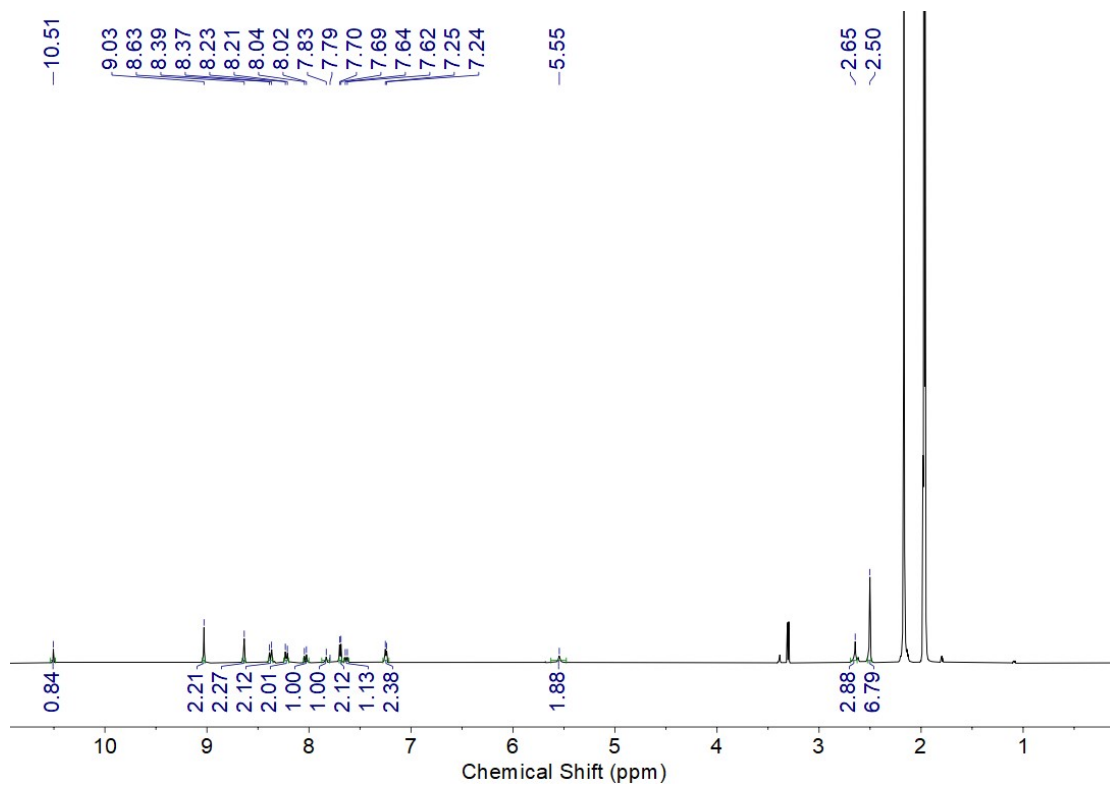

1

2 **Figure S8.**  $^1\text{H}$  NMR spectrum of **Cage** in  $\text{CD}_3\text{CN}$ .

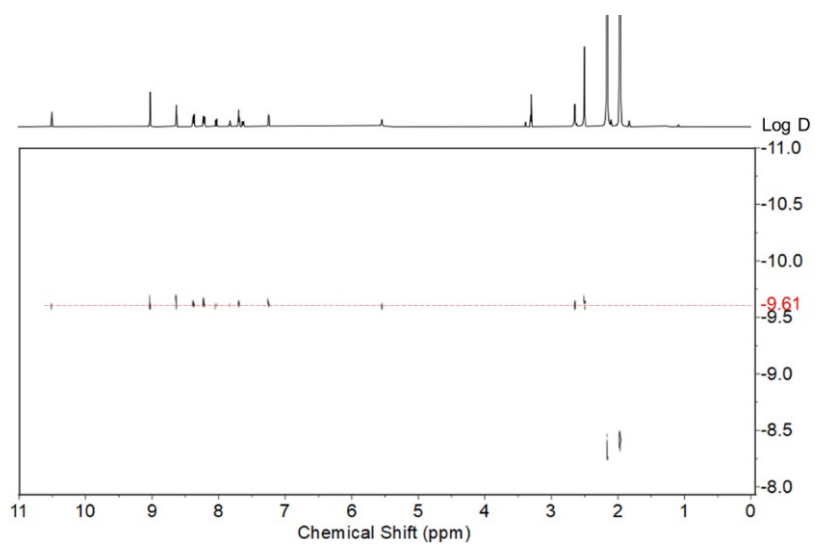

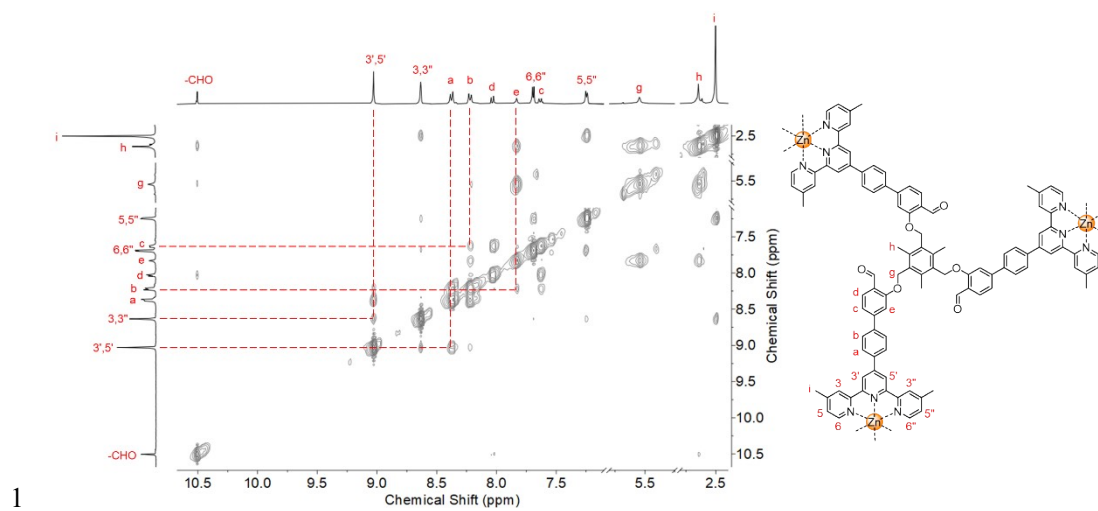

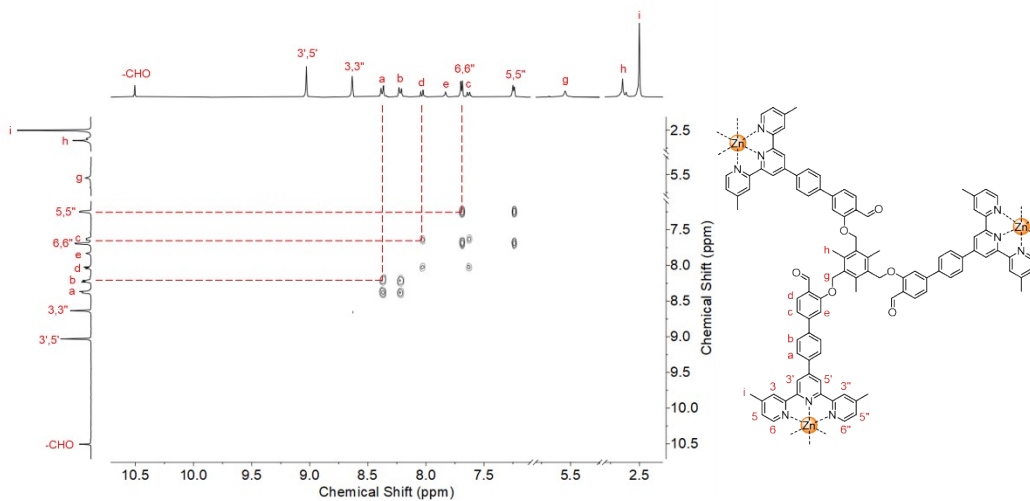

1

2 **Figure S11.** COSY spectrum of **Cage** in  $CD_3CN$ .

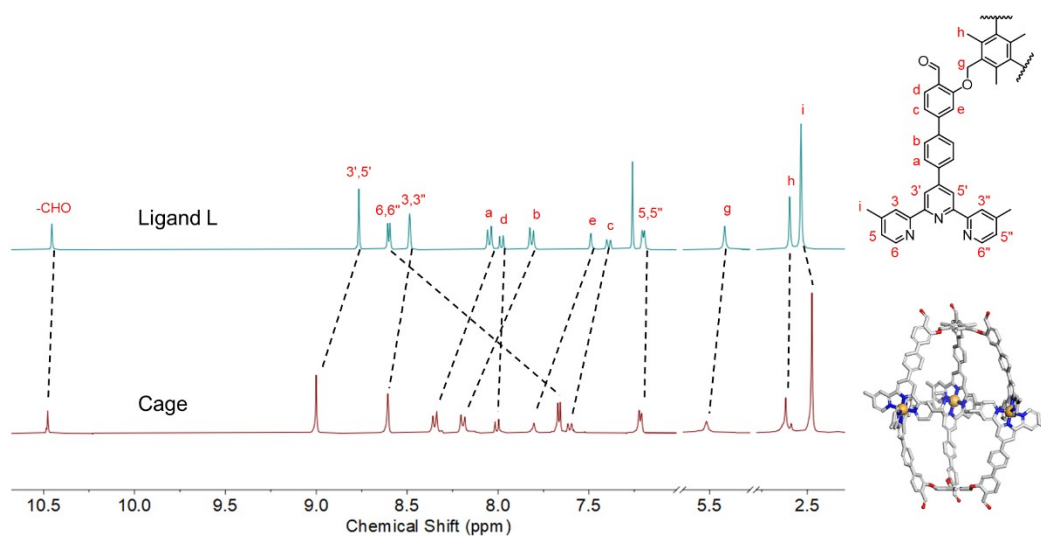

1  
 2 **Figure S12.** <sup>1</sup>H NMR spectrum of ligand **L** (in CDCl<sub>3</sub>, top) and **Cage** (in CD<sub>3</sub>CN, bottom).

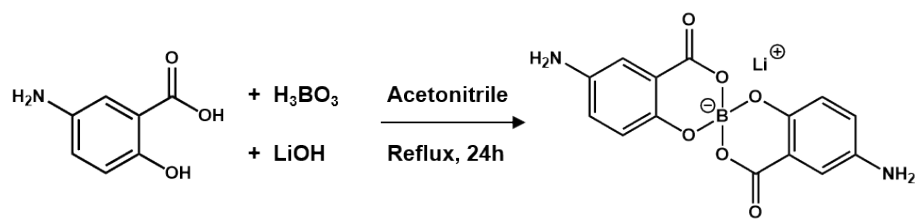

1

2 **Figure S13.** Synthesis diagram of LiB5AB.

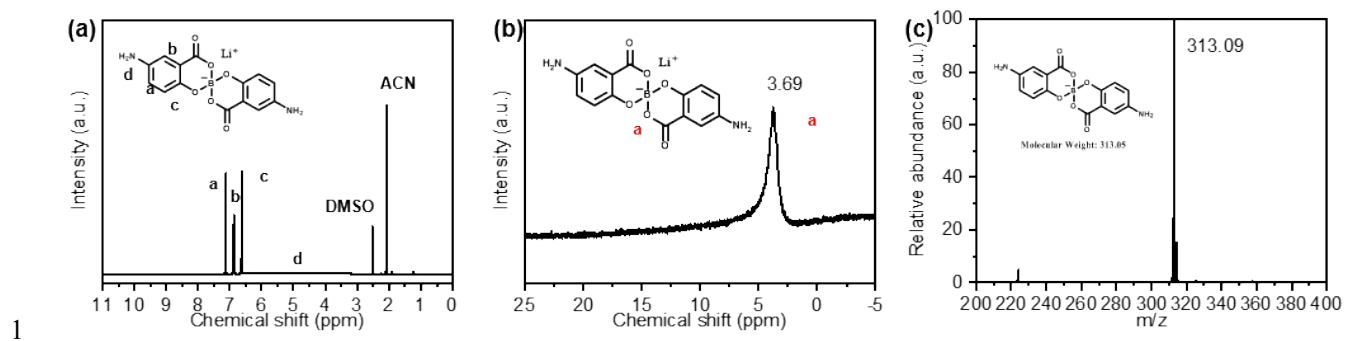

2 **Figure S14.** (a)  $^1\text{H}$  NMR and (b)  $^{11}\text{B}$  NMR spectra of LiB5AB. (c) Mass spectrum of LiB5AB.

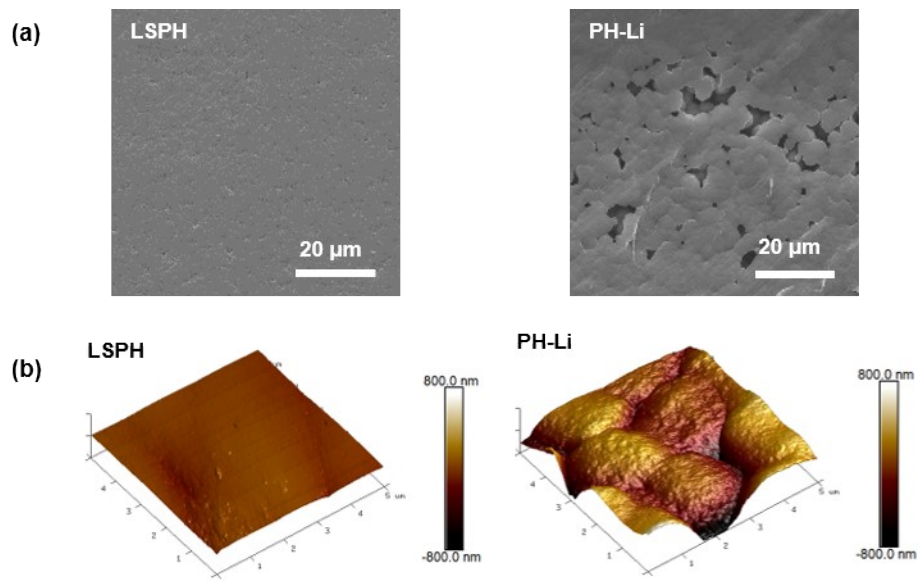

1  
2 **Figure S15.** The (a) SEM images and (b) AFM images of LSPH (left) and PH-Li (right) electrolytes.

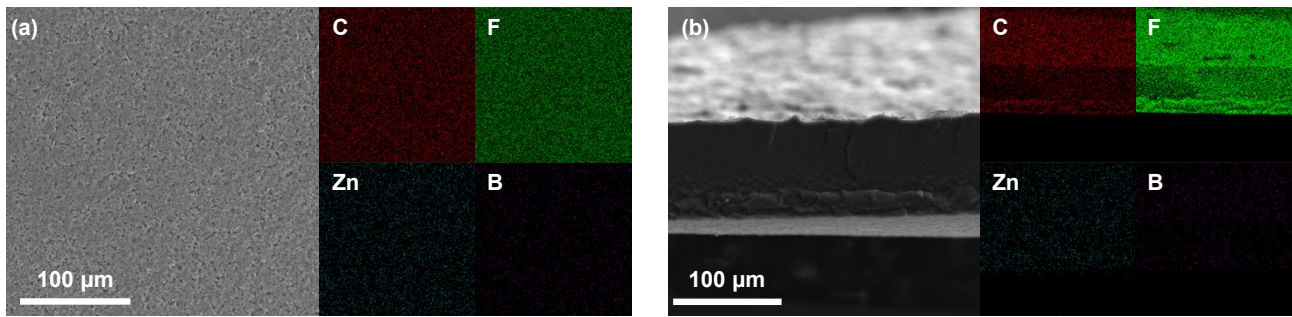

1  
2 **Figure S16.** Surface (a) and cross-sectional (b) SEM images with corresponding EDS elemental  
3 mappings (C, F, Zn, and B) of the LSPH membrane.

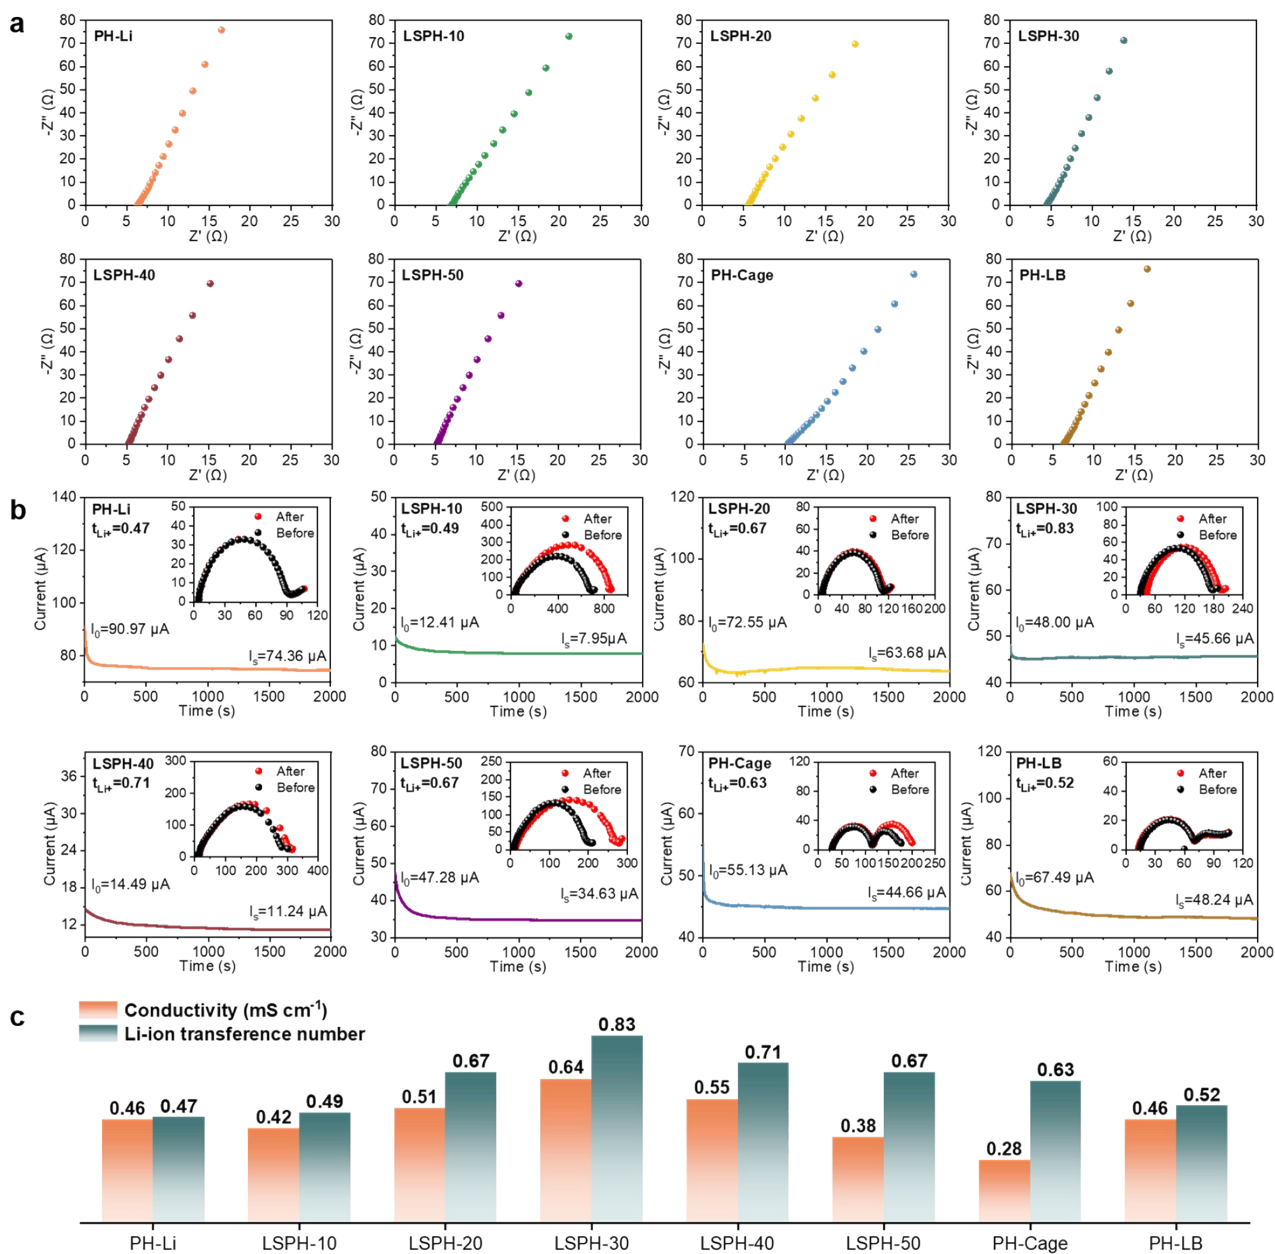

1

2 **Figure S17.** a) The EIS spectra of PH-Li, LSPH-10, LSPH-20, LSPH-30, LSPH-40, LSPH-50, PH-  
3 Cage and PH-LB electrolytes. b) Chronoamperometry profiles and AC impedance spectra before and  
4 after polarization (inset) for symmetric Li||Li cell with PH-Li, LSPH-10, LSPH-20, LSPH-30, LSPH-  
5 40, LSPH-50, PH-Cage and PH-LB electrolytes. c) Room-temperature ionic conductivity and Li-ion  
6 transference number of PH-Li, LSPH-10, LSPH-20, LSPH-30, LSPH-40, LSPH-50, PH-Cage and PH-  
7 LB electrolytes.

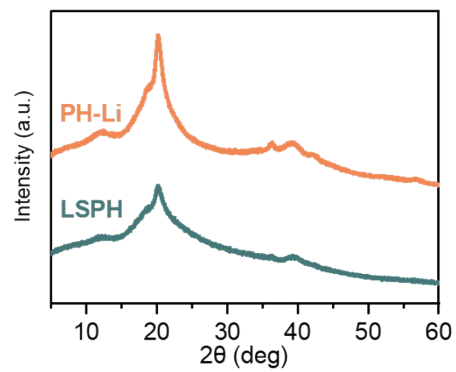

1

2 **Figure S18.** The XRD spectra of LSPH and PH-Li electrolytes.

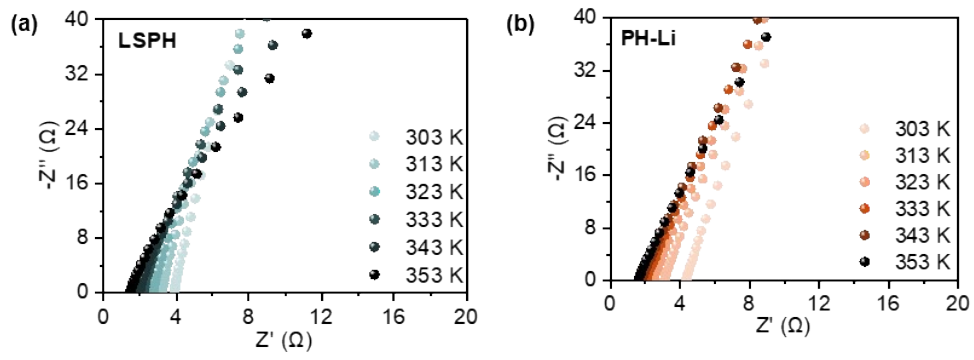

1  
2 **Figure S19.** The EIS spectra of a) LSPH and b) PH-Li at different temperatures.

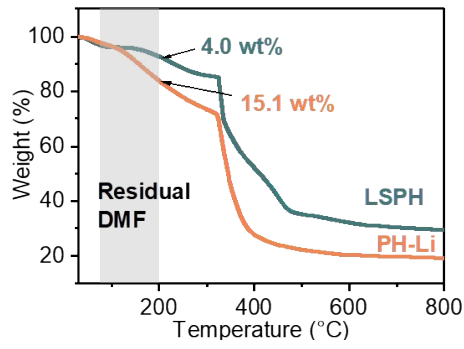

1

2 **Figure S20.** The TGA spectra of LSPH and PH-Li electrolytes.

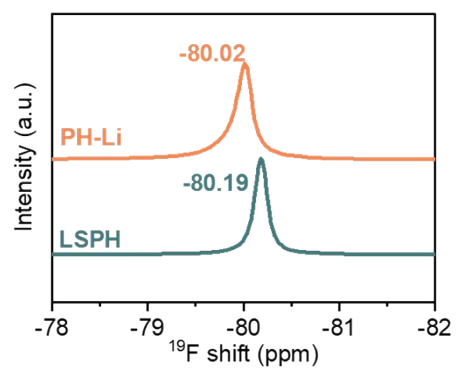

1

2 **Figure S21.**  $^{19}\text{F}$  NMR spectra of LSPH and PH-Li.

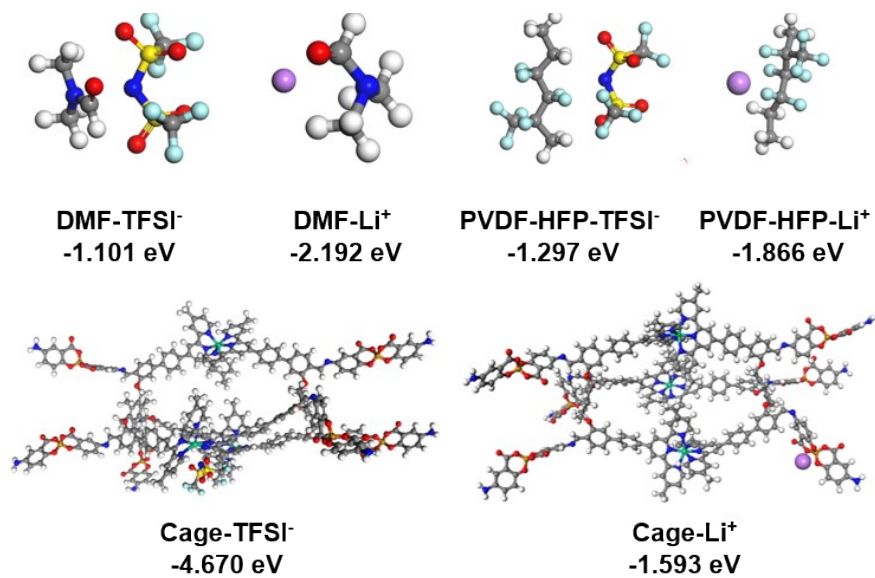

1  
 2 **Figure S22.** The coordination structures and the calculation of the binding energy for the molecular  
 3 structures of PVDF-HFP, DMF and LS with Li<sup>+</sup> and TFSI<sup>-</sup>, respectively.

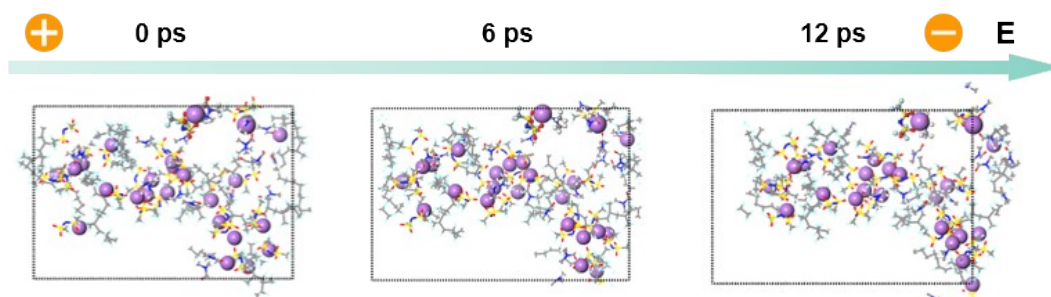

1  
2 **Figure S23.** The migration model of  $\text{Li}^+$ ,  $\text{TFSI}^-$  and DMF in PH-Li under electric field.

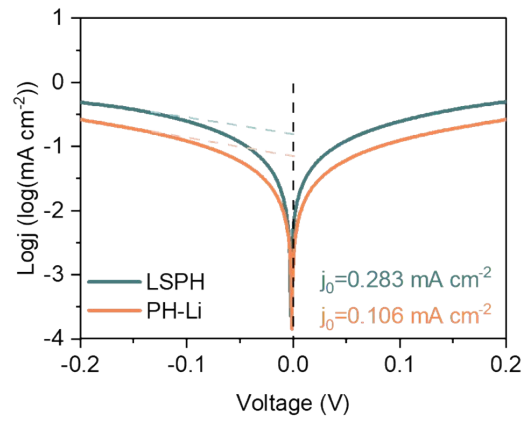

1

2 **Figure S24.** Tafel curves of Li||Li symmetric cells with LSPH and PH-Li electrolytes.

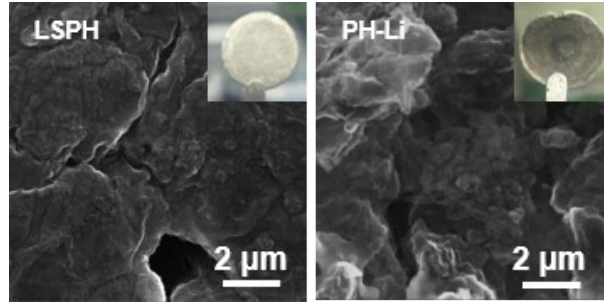

1  
2 **Figure S25.** Top-view SEM images of Li metal electrode using LSPH and PH-Li electrolytes after  
3 100 cycles at  $1.0 \text{ mA cm}^{-2}$ .

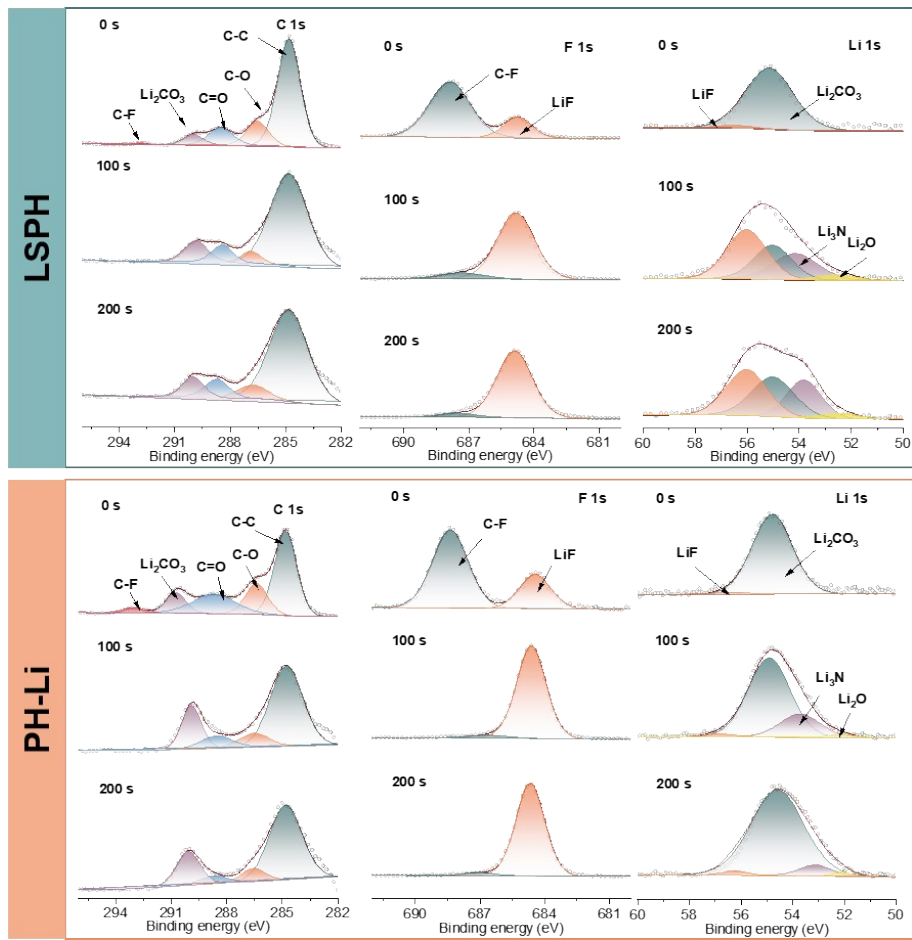

1

2 **Figure S26.** XPS spectra for C 1s, F 1s and Li 1s of the cycled Li metal anode in Li|LSPH|Li and  
 3 Li|PH-Li|Li cell.

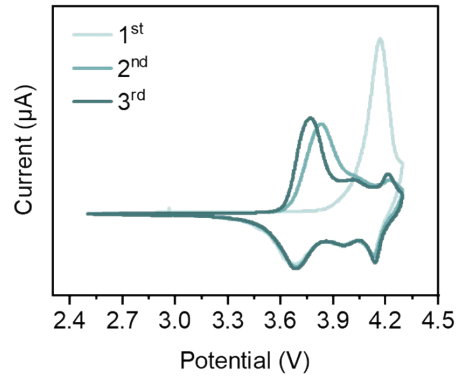

1

2 **Figure S27.** CV curve for Li|LSPH|NCM811 cell at 0.1 mV s<sup>-1</sup>.

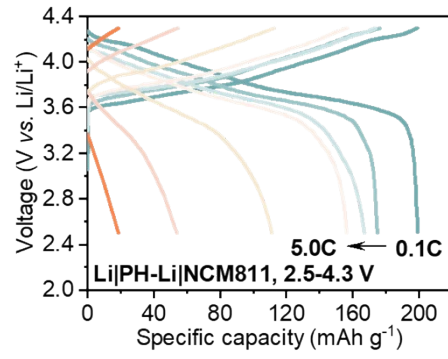

- 1
- 2 **Figure S28.** Charge/discharge profiles of Li|PH-Li|NCM811 cell at different rate.

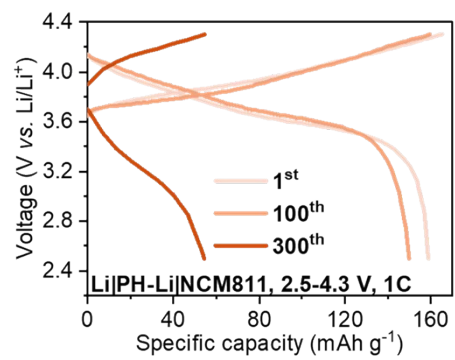

1

2 **Figure S29.** Charge/discharge profiles of Li|PH-Li|NCM811 cell at 1C.

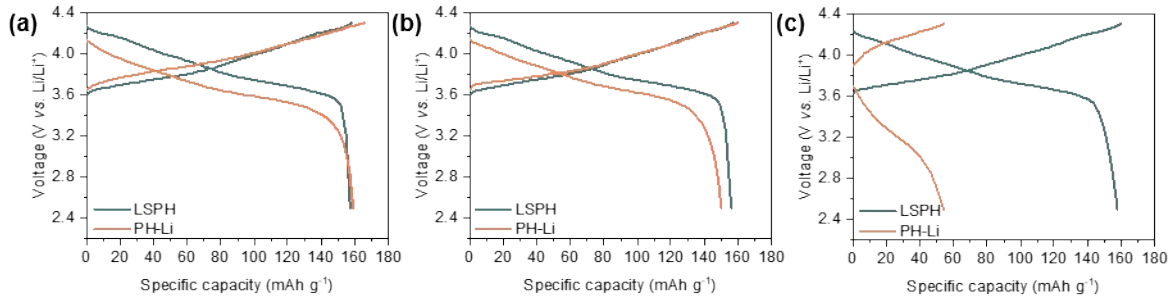

1  
 2 **Figure S30.** Comparison of charge-discharge profiles of Li||LSPH||NCM811 and Li||PH-  
 3 Li||NCM811 full cells at 1.0 C (a) 1<sup>st</sup> cycle, (b) 100th cycle, and (c) 300<sup>th</sup> cycle.  
 4

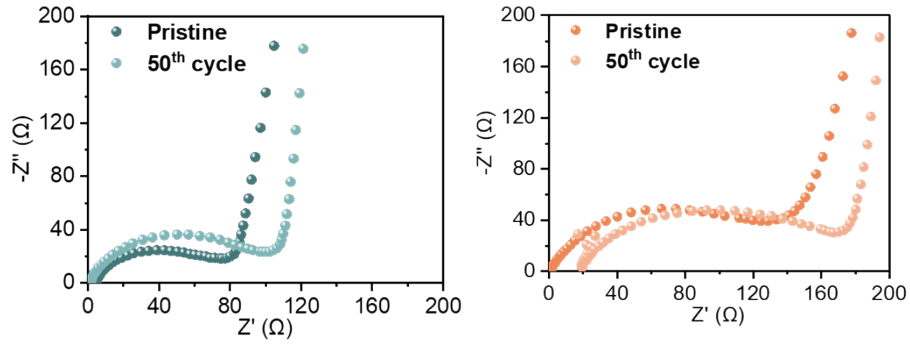

1

2 **Figure S31.** Electrochemical impedance measurements of the Li||NCM811 batteries with (a) LSPH  
 3 and (b) PH-Li electrolytes, conducted before and after 50<sup>th</sup> cycle test.

1 **Table S1.** Comparison of Li|SPEs|Li batteries performance

| Number           | Electrolytes        | Residual solvent content (wt.%) | Current density (mA cm <sup>-2</sup> ) | Cycle time (h) | References                                                |
|------------------|---------------------|---------------------------------|----------------------------------------|----------------|-----------------------------------------------------------|
| 1                | PVMS-15             | 12.46                           | 1                                      | 480            | <i>Nat. Commun.</i> , <b>2023</b> , 14, 6296              |
| 2                | PVBL                | 14.4                            | 1                                      | 300            | <i>Nat. Nanotechnol.</i> , <b>2023</b> , 18, 602-610      |
| 3                | HFGP-SE             | 22.7                            | 0.5                                    | 1200           | <i>Energy Environ. Sci.</i> , <b>2025</b> , 18, 227-235   |
| 4                | PPM                 | 18.3                            | 0.5                                    | 500            | <i>Energy Environ. Sci.</i> , <b>2024</b> , 17, 8274-8283 |
| 5                | BPLE-1              | 3.3                             | 0.3                                    | 800            | <i>Adv. Funct. Mater.</i> , <b>2025</b> , 2424763         |
| 6                | LPS <sub>x</sub> -5 | 4                               | 1                                      | 400            | <i>Adv. Mater.</i> , <b>2025</b> , 2419271                |
| 7                | PV-MS20             | 17.1                            | 0.5                                    | 240            | <i>Angew. Chem. Int. Ed.</i> , <b>2024</b> , e202401428   |
| 8                | CPS-6               | 3.4                             | 0.5                                    | 800            | <i>Angew. Chem. Int. Ed.</i> , <b>2025</b> , e202423227   |
| 9                | F-PVDF              | 11.1                            | 1                                      | 900            | <i>Adv. Mater.</i> , <b>2025</b> , 2504419                |
| 10               | d-PVDF SPE          | 17.65                           | 0.3                                    | 275            | <i>Energy Environ. Sci.</i> , <b>2024</b> , 17, 8243-8253 |
| 11               | PTZN                | 9                               | 0.2                                    | 1000           | <i>Adv. Sci.</i> , <b>2025</b> , 12, 2413875              |
| 12               | PLLDB               | 17                              | 0.25                                   | 270            | <i>J. Am. Chem. Soc.</i> , <b>2023</b> , 145, 25632-25642 |
| <b>This work</b> | <b>LSPH</b>         | <b>4</b>                        | <b>1</b>                               | <b>1000</b>    |                                                           |

## 1 Reference

- 2 1. G. Kresse and J. Furthmüller, *Comput. Mater. Sci.*, 1996, **6**, 15-50.
- 3 2. G. Kresse and J. Furthmüller, *Phys. Rev. B: Condens. Matter Mater. Phys.*, 1996, **54**, 11169-  
4 11186.
- 5 3. J. P. Perdew, K. Burke and M. Ernzerhof, *Phys. Rev. Lett.*, 1996, **77**, 3865-3868.
- 6 4. S. Grimme, J. Antony, S. Ehrlich and H. Krieg, *J. Chem. Phys.*, 2010, **132**, 154104.
- 7 5. H. J. Monkhorst and J. D. Pack, *Phys. Rev. B: Solid State*, 1976, **13**, 5188-5192.
- 8 6. W. G. Hoover, *Phys. Rev. A*, 1985, **31**, 1695-1697.
- 9 7. S. Nosé, *J. Chem. Phys.*, 1984, **81**, 511-519.
- 10 8. G. Wang, M. Chen, J. Wang, Z. Jiang, D. Liu, D. Lou, H. Zhao, K. Li, S. Li, T. Wu, Z. Jiang, X.  
11 Sun and P. Wang, *J. Am. Chem. Soc.*, 2020, **142**, 7690-7698.
